# Supplementary material for: Methylsulfonylmethane Improves Knee Quality of Life in Participants with Mild Knee Pain: A Randomized, Double-Blind, Placebo-Controlled Trial
Source: MDPI journal article supplement (doi:10.3390/nu15132995), 2023-06-30
Supplement: s1 [file s1]

Supplementary Table S1. Comparison of the amount of change in JKOM and JOA scores at each week from week 0.

|        |                                 | 0 to 4 week        |             |               |                       |                        |                      | 0 to 8 week  |              |                        |       |                        |                      | 0 to 12 week |                       |               |      |                        |                      |
|--------|---------------------------------|--------------------|-------------|---------------|-----------------------|------------------------|----------------------|--------------|--------------|------------------------|-------|------------------------|----------------------|--------------|-----------------------|---------------|------|------------------------|----------------------|
|        |                                 | MSM group          |             | Placebo group |                       | difference<br>(95% CI) | P value <sup>1</sup> | MSM group    |              | Placebo group          |       | difference<br>(95% CI) | P value <sup>1</sup> | MSM group    |                       | Placebo group |      | difference<br>(95% CI) | P value <sup>1</sup> |
| (Unit) |                                 | Mean               | ± SD        | Mean          | ± SD                  |                        |                      | Mean         | ± SD         | Mean                   | ± SD  |                        |                      | Mean         | ± SD                  | Mean          | ± SD |                        |                      |
| JKOM   | I :VAS                          | (amount of change) | -3.8 ± 26.0 | -8.4 ± 28.7   | 1.8<br>(-7.5 to 11.2) | 0.696                  |                      | -12.6 ± 26.3 | -12.3 ± 28.1 | -3.2<br>(-12.6 to 6.1) | 0.493 |                        | -13.5 ± 26.8         | -16.1 ± 25.5 | 0.2<br>(-9.1 to 9.5)  | 0.966         |      |                        |                      |
|        | II :Pain and stiffness in knees | (amount of change) | -1.6 ± 3.1  | -1.5 ± 3.9    | -0.3<br>(-1.6 to 1.0) | 0.659                  |                      | -2.7 ± 3.1   | -2.3 ± 3.7   | -0.6<br>(-1.8 to 0.7)  | 0.388 |                        | -4.1 ± 2.9           | -3.3 ± 3.3   | -0.1<br>(-2.3 to 0.3) | 0.123         |      |                        |                      |
|        | III :Condition in daily life    | (amount of change) | -1.4 ± 3.7  | -1.3 ± 3.7    | -0.2<br>(-1.5 to 1.1) | 0.745                  |                      | -1.9 ± 2.7   | -1.9 ± 3.5   | -0.2<br>(-1.4 to 1.1)  | 0.803 |                        | -2.8 ± 3.0           | -2.6 ± 2.7   | -0.4<br>(-1.7 to 0.8) | 0.493         |      |                        |                      |
|        | IV :General activities          | (amount of change) | -0.9 ± 1.6  | -1.5 ± 2.1    | 0.1<br>(-0.6 to 0.7)  | 0.806                  |                      | -1.4 ± 2.2   | -1.8 ± 1.9   | -0.1<br>(-0.8 to 0.5)  | 0.66  |                        | -1.9 ± 2.4           | -2.3 ± 2.4   | -0.3<br>(-1.0 to 0.3) | 0.280         |      |                        |                      |
|        | V :Health conditions            | (amount of change) | -0.7 ± 1.0  | -0.7 ± 1.3    | -0.1<br>(-0.6 to 0.3) | 0.556                  |                      | -0.9 ± 1.0   | -0.9 ± 1.0   | -0.1<br>(-0.5 to 0.4)  | 0.693 |                        | -1.3 ± 1.1           | -0.9 ± 1.3   | -0.5<br>(-0.9 to 0.0) | 0.032*        |      |                        |                      |
|        | Total JKOM score                | (amount of change) | -4.6 ± 6.1  | -4.9 ± 8.9    | -0.2<br>(-3.1 to 2.7) | 0.891                  |                      | -6.9 ± 6.1   | -6.9 ± 7.9   | -0.8<br>(-3.7 to 2.1)  | 0.588 |                        | -10.2 ± 7.0          | -9.0 ± 7.0   | -2.1<br>(-5.0 to 0.7) | 0.144         |      |                        |                      |
| JOA    | Total score                     | (amount of change) | -0.5 ± 6.5  | 0.6 ± 5.4     | -1.1<br>(-3.2 to 1.0) | 0.303                  |                      | 0.6 ± 6.7    | 0.7 ± 4.7    | -0.1<br>(-2.1 to 2.0)  | 0.954 |                        | 0.5 ± 7.4            | 0.8 ± 6.2    | -0.2<br>(-2.3 to 1.8) | 0.817         |      |                        |                      |

CI, confidence interval; <sup>1</sup> Comparison between groups using a linear mixed model with baseline values as covariates, time points, groups, time and group interactions, baseline values and time point interactions, and study participants as factors. \*  $p < 0.05$  between the MSM and placebo groups.

Supplementary Table S2. Comparison of the amount of change in IL-1 $\beta$ , IL-6, Hs-CRP and CIIC at each week from week 0.

|              |  | 0 to 4 week |      |               |      | 0 to 8 week            |                      |              |      | 0 to 12 week  |      |                        |                      |
|--------------|--|-------------|------|---------------|------|------------------------|----------------------|--------------|------|---------------|------|------------------------|----------------------|
|              |  | MSM group   |      | Placebo group |      | difference<br>(95% CI) | P value <sup>1</sup> | MSM group    |      | Placebo group |      | difference<br>(95% CI) | P value <sup>1</sup> |
| (Unit)       |  | Mean        | ± SD | Mean          | ± SD |                        |                      | Mean         | ± SD | Mean          | ± SD |                        |                      |
| IL-1 $\beta$ |  | 0.0 ± 0.1   |      | 0.0 ± 0.0     |      | 0.0<br>(0.0 to 0.0)    | 0.790                | 0.0 ± 0.1    |      | 0.0 ± 0.0     |      | 0.0<br>(0.0 to 0.0)    | 0.191                |
| IL-6         |  | 0.4 ± 0.7   |      | 0.4 ± 0.8     |      | 0.0<br>(-0.2 to 0.3)   | 0.758                | 0.2 ± 0.5    |      | 0.4 ± 0.5     |      | -0.2<br>(-0.5 to 0.1)  | 0.155                |
| Hs-CRP       |  | 0.0 ± 0.2   |      | 0.1 ± 0.5     |      | 0.0<br>(-0.2 to 0.1)   | 0.502                | 0.0 ± 0.1    |      | 0.0 ± 0.2     |      | 0.0<br>(-0.2 to 0.1)   | 0.590                |
| CIIC         |  | 9.8 ± 37.6  |      | 21.0 ± 42.7   |      | -1.9<br>(-12.3 to 8.5) | 0.722                | -25.8 ± 28.9 |      | -21.5 ± 25.6  |      | 2.8<br>(-7.6 to 13.2)  | 0.597                |
|              |  |             |      |               |      |                        |                      |              |      |               |      |                        |                      |

CI, confidence interval; <sup>1</sup> Comparison between groups using a linear mixed model with baseline values as covariates, time points, groups, time and group interactions, baseline values and time point interactions, and study participants as factors.

Supplementary Table S3. Urine Analysis of Safety evaluation

| Inspection item |              | period  | MSM group |                                 |                                         | Placebo group |                                 |                                         | group comparison * |         |         |                |       |
|-----------------|--------------|---------|-----------|---------------------------------|-----------------------------------------|---------------|---------------------------------|-----------------------------------------|--------------------|---------|---------|----------------|-------|
|                 |              |         | n         | number of eligible participants | Percentage of eligible participants (%) | n             | number of eligible participants | Percentage of eligible participants (%) | △ (%)              | 95% CI- | 95% CI+ | χ <sup>2</sup> | P     |
| urine           | protein      | 4 week  | 44        | 0                               | 0.0                                     | 44            | 1                               | 2.3                                     | -2.3               | -6.7    | 2.2     | 1.011          | 1.000 |
|                 |              | 8 week  | 43        | 1                               | 2.3                                     | 44            | 1                               | 2.3                                     | 0.1                | -6.2    | 6.4     | 0.000          | 1.000 |
|                 |              | 12 week | 43        | 1                               | 2.3                                     | 44            | 2                               | 4.5                                     | -2.2               | -9.9    | 5.4     | 0.322          | 1.000 |
|                 | glucose      | 4 week  | 44        | 0                               | 0.0                                     | 44            | 0                               | 0.0                                     | 0.0                | N.A.    | N.A.    | N.A.           | N.A.  |
|                 |              | 8 week  | 43        | 0                               | 0.0                                     | 44            | 1                               | 2.3                                     | -2.3               | -6.8    | 2.2     | 0.989          | 1.000 |
|                 |              | 12 week | 43        | 0                               | 0.0                                     | 44            | 1                               | 2.3                                     | -2.3               | -6.8    | 2.2     | 0.989          | 1.000 |
|                 | urobilinogen | 4 week  | 44        | 1                               | 2.3                                     | 44            | 0                               | 0.0                                     | 2.3                | -2.2    | 6.7     | 1.011          | 1.000 |
|                 |              | 8 week  | 43        | 0                               | 0.0                                     | 44            | 0                               | 0.0                                     | 0.0                | N.A.    | N.A.    | N.A.           | N.A.  |
|                 |              | 12 week | 43        | 0                               | 0.0                                     | 44            | 0                               | 0.0                                     | 0.0                | N.A.    | N.A.    | N.A.           | N.A.  |
|                 | bilirubin    | 4 week  | 44        | 0                               | 0.0                                     | 44            | 0                               | 0.0                                     | 0.0                | N.A.    | N.A.    | N.A.           | N.A.  |
|                 |              | 8 week  | 43        | 0                               | 0.0                                     | 44            | 0                               | 0.0                                     | 0.0                | N.A.    | N.A.    | N.A.           | N.A.  |
|                 |              | 12 week | 43        | 0                               | 0.0                                     | 44            | 0                               | 0.0                                     | 0.0                | N.A.    | N.A.    | N.A.           | N.A.  |
|                 | pH           | 4 week  | 44        | 1                               | 2.3                                     | 44            | 0                               | 0.0                                     | 2.3                | -2.2    | 6.7     | 1.011          | 1.000 |
|                 |              | 8 week  | 43        | 1                               | 2.3                                     | 44            | 0                               | 0.0                                     | 2.3                | -2.2    | 6.8     | 1.035          | 0.494 |
|                 |              | 12 week | 43        | 0                               | 0.0                                     | 44            | 1                               | 2.3                                     | -2.3               | -6.8    | 2.2     | 0.989          | 1.000 |
|                 | occult blood | 4 week  | 44        | 3                               | 6.8                                     | 44            | 5                               | 11.4                                    | -4.5               | -16.6   | 7.5     | 0.550          | 0.713 |
|                 |              | 8 week  | 43        | 4                               | 9.3                                     | 44            | 2                               | 4.5                                     | 4.8                | -5.9    | 15.4    | 0.766          | 0.434 |
|                 |              | 12 week | 43        | 7                               | 16.3                                    | 44            | 2                               | 4.5                                     | 11.7               | -1.1    | 24.5    | 3.228          | 0.089 |

n: number ;△: between-group difference (test food group - placebo group);95% CI -: 95% lower confidence interval/95% CI +: 95% upper confidence interval/chi 2: chi-square value; P: significant probability; 4 week: at test after 4 weeks of intake; 8 week: at test after 8 weeks of intake; 12 week : at test after 12 weeks of intake; N.A.: Not Available; \*: comparison between groups using chi-square test

Supplementary Table S4. Blood analysis of safety evaluation (1)

| Inspection item | period            | MSM group |                                 |                                         | Placebo group |                                 |                                         | group comparison * |         |         |                |       |
|-----------------|-------------------|-----------|---------------------------------|-----------------------------------------|---------------|---------------------------------|-----------------------------------------|--------------------|---------|---------|----------------|-------|
|                 |                   | n         | number of eligible participants | Percentage of eligible participants (%) | n             | number of eligible participants | Percentage of eligible participants (%) | △ (%)              | 95% CI- | 95% CI+ | χ <sup>2</sup> | P     |
| blood           | ketone bodies     | 4 week    | 44                              | 1                                       | 2.3           | 44                              | 0                                       | 0.0                | 2.3     | -2.2    | 6.7            | 1.000 |
|                 |                   | 8 week    | 43                              | 1                                       | 2.3           | 44                              | 2                                       | 4.5                | -2.2    | -9.9    | 5.4            | 0.322 |
|                 |                   | 12 week   | 43                              | 0                                       | 0.0           | 44                              | 0                                       | 0.0                | 0.0     | N.A.    | N.A.           | N.A.  |
|                 | white blood cells | 4 week    | 44                              | 0                                       | 0.0           | 44                              | 1                                       | 2.3                | -2.3    | -6.7    | 2.2            | 1.011 |
|                 |                   | 8 week    | 43                              | 1                                       | 2.3           | 44                              | 3                                       | 6.8                | -4.5    | -13.3   | 4.3            | 1.001 |
|                 |                   | 12 week   | 43                              | 1                                       | 2.3           | 44                              | 3                                       | 6.8                | -4.5    | -13.3   | 4.3            | 1.001 |
|                 | red blood cells   | 4 week    | 44                              | 1                                       | 2.3           | 44                              | 1                                       | 2.3                | 0.0     | -6.2    | 6.2            | 0.000 |
|                 |                   | 8 week    | 43                              | 4                                       | 9.3           | 44                              | 1                                       | 2.3                | 7.0     | -2.8    | 16.8           | 1.984 |
|                 |                   | 12 week   | 43                              | 2                                       | 4.7           | 44                              | 1                                       | 2.3                | 2.4     | -5.3    | 10.0           | 0.370 |
|                 | hemoglobin        | 4 week    | 44                              | 2                                       | 4.5           | 44                              | 0                                       | 0.0                | 4.5     | -1.7    | 10.8           | 2.047 |
|                 |                   | 8 week    | 43                              | 2                                       | 4.7           | 44                              | 0                                       | 0.0                | 4.7     | -1.6    | 10.9           | 2.095 |
|                 |                   | 12 week   | 43                              | 1                                       | 2.3           | 44                              | 2                                       | 4.5                | -2.2    | -9.9    | 5.4            | 0.322 |
|                 | hematocrit        | 4 week    | 44                              | 2                                       | 4.5           | 44                              | 3                                       | 6.8                | -2.3    | -11.9   | 7.4            | 0.212 |
|                 |                   | 8 week    | 43                              | 2                                       | 4.7           | 44                              | 2                                       | 4.5                | 0.1     | -8.7    | 8.9            | 0.001 |
|                 |                   | 12 week   | 43                              | 5                                       | 11.6          | 44                              | 3                                       | 6.8                | 4.8     | -7.3    | 17.0           | 0.603 |
|                 | platelet count    | 4 week    | 44                              | 2                                       | 4.5           | 44                              | 3                                       | 6.8                | -2.3    | -11.9   | 7.4            | 0.212 |
|                 |                   | 8 week    | 43                              | 1                                       | 2.3           | 44                              | 4                                       | 9.1                | -6.8    | -16.5   | 3.0            | 1.838 |
|                 |                   | 12 week   | 43                              | 0                                       | 0.0           | 44                              | 2                                       | 4.5                | -4.5    | -10.8   | 1.8            | 2.001 |
|                 | MCV               | 4 week    | 44                              | 0                                       | 0.0           | 44                              | 1                                       | 2.3                | -2.3    | -6.7    | 2.2            | 1.011 |
|                 |                   | 8 week    | 43                              | 1                                       | 2.3           | 44                              | 1                                       | 2.3                | 0.1     | -6.2    | 6.4            | 0.000 |
|                 |                   | 12 week   | 43                              | 0                                       | 0.0           | 44                              | 1                                       | 2.3                | -2.3    | -6.8    | 2.2            | 0.989 |
|                 | MCH               | 4 week    | 44                              | 0                                       | 0.0           | 44                              | 0                                       | 0.0                | 0.0     | N.A.    | N.A.           | N.A.  |
|                 |                   | 8 week    | 43                              | 2                                       | 4.7           | 44                              | 0                                       | 0.0                | 4.7     | -1.6    | 10.9           | 2.095 |
|                 |                   | 12 week   | 43                              | 0                                       | 0.0           | 44                              | 1                                       | 2.3                | -2.3    | -6.8    | 2.2            | 0.989 |
|                 | MCHC              | 4 week    | 44                              | 0                                       | 0.0           | 44                              | 1                                       | 2.3                | -2.3    | -6.7    | 2.2            | 1.011 |
|                 |                   | 8 week    | 43                              | 0                                       | 0.0           | 44                              | 0                                       | 0.0                | 0.0     | N.A.    | N.A.           | N.A.  |
|                 |                   | 12 week   | 43                              | 1                                       | 2.3           | 44                              | 1                                       | 2.3                | 0.1     | -6.2    | 6.4            | 0.000 |
|                 | neutrophil rate   | 4 week    | 44                              | 0                                       | 0.0           | 44                              | 1                                       | 2.3                | -2.3    | -6.7    | 2.2            | 1.011 |
|                 |                   | 8 week    | 43                              | 0                                       | 0.0           | 44                              | 0                                       | 0.0                | 0.0     | N.A.    | N.A.           | N.A.  |
|                 |                   | 12 week   | 43                              | 1                                       | 2.3           | 44                              | 0                                       | 0.0                | 2.3     | -2.2    | 6.8            | 1.035 |
|                 | lymphocyte rate   | 4 week    | 44                              | 0                                       | 0.0           | 44                              | 1                                       | 2.3                | -2.3    | -6.7    | 2.2            | 1.011 |
|                 |                   | 8 week    | 43                              | 0                                       | 0.0           | 44                              | 1                                       | 2.3                | -2.3    | -6.8    | 2.2            | 0.989 |
|                 |                   | 12 week   | 43                              | 1                                       | 2.3           | 44                              | 0                                       | 0.0                | 2.3     | -2.2    | 6.8            | 1.035 |
|                 | monocyte rate     | 4 week    | 44                              | 0                                       | 0.0           | 44                              | 1                                       | 2.3                | -2.3    | -6.7    | 2.2            | 1.011 |
|                 |                   | 8 week    | 43                              | 0                                       | 0.0           | 44                              | 0                                       | 0.0                | 0.0     | N.A.    | N.A.           | N.A.  |
|                 |                   | 12 week   | 43                              | 1                                       | 2.3           | 44                              | 0                                       | 0.0                | 2.3     | -2.2    | 6.8            | 1.035 |
|                 | eosinophil rate   | 4 week    | 44                              | 1                                       | 2.3           | 44                              | 0                                       | 0.0                | 2.3     | -2.2    | 6.7            | 1.011 |
|                 |                   | 8 week    | 43                              | 1                                       | 2.3           | 44                              | 1                                       | 2.3                | 0.1     | -6.2    | 6.4            | 0.000 |
|                 |                   | 12 week   | 43                              | 0                                       | 0.0           | 44                              | 0                                       | 0.0                | 0.0     | N.A.    | N.A.           | N.A.  |
|                 | basophil rate     | 4 week    | 44                              | 0                                       | 0.0           | 44                              | 0                                       | 0.0                | 0.0     | N.A.    | N.A.           | N.A.  |
|                 |                   | 8 week    | 43                              | 0                                       | 0.0           | 44                              | 0                                       | 0.0                | 0.0     | N.A.    | N.A.           | N.A.  |
|                 |                   | 12 week   | 43                              | 0                                       | 0.0           | 44                              | 0                                       | 0.0                | 0.0     | N.A.    | N.A.           | N.A.  |
|                 | AST (GOT)         | 4 week    | 44                              | 0                                       | 0.0           | 44                              | 0                                       | 0.0                | 0.0     | N.A.    | N.A.           | N.A.  |
|                 |                   | 8 week    | 43                              | 0                                       | 0.0           | 44                              | 0                                       | 0.0                | 0.0     | N.A.    | N.A.           | N.A.  |
|                 |                   | 12 week   | 43                              | 0                                       | 0.0           | 44                              | 0                                       | 0.0                | 0.0     | N.A.    | N.A.           | N.A.  |
|                 | ALT (GPT)         | 4 week    | 44                              | 0                                       | 0.0           | 44                              | 0                                       | 0.0                | 0.0     | N.A.    | N.A.           | N.A.  |
|                 |                   | 8 week    | 43                              | 0                                       | 0.0           | 44                              | 1                                       | 2.3                | -2.3    | -6.8    | 2.2            | 0.989 |
|                 |                   | 12 week   | 43                              | 0                                       | 0.0           | 44                              | 0                                       | 0.0                | 0.0     | N.A.    | N.A.           | N.A.  |
|                 | γ-GT (γ-GTP)      | 4 week    | 44                              | 2                                       | 4.5           | 44                              | 1                                       | 2.3                | 2.3     | -5.3    | 9.9            | 0.345 |
|                 |                   | 8 week    | 43                              | 2                                       | 4.7           | 44                              | 1                                       | 2.3                | 2.4     | -5.3    | 10.0           | 0.370 |
|                 |                   | 12 week   | 43                              | 1                                       | 2.3           | 44                              | 0                                       | 0.0                | 2.3     | -2.2    | 6.8            | 1.035 |
|                 | ALP               | 4 week    | 44                              | 0                                       | 0.0           | 44                              | 1                                       | 2.3                | -2.3    | -6.7    | 2.2            | 1.011 |
|                 |                   | 8 week    | 43                              | 1                                       | 2.3           | 44                              | 2                                       | 4.5                | -2.2    | -9.9    | 5.4            | 0.322 |
|                 |                   | 12 week   | 43                              | 1                                       | 2.3           | 44                              | 1                                       | 2.3                | 0.1     | -6.2    | 6.4            | 0.000 |
|                 | LD (LDH)          | 4 week    | 44                              | 4                                       | 9.1           | 44                              | 9                                       | 20.5               | -11.4   | -26.2   | 3.5            | 2.256 |
|                 |                   | 8 week    | 43                              | 5                                       | 11.6          | 44                              | 4                                       | 9.1                | 2.5     | -10.3   | 15.3           | 0.151 |
|                 |                   | 12 week   | 43                              | 5                                       | 11.6          | 44                              | 6                                       | 13.6               | -2.0    | -16.0   | 12.0           | 0.079 |
|                 | LAP               | 4 week    | 44                              | 3                                       | 6.8           | 44                              | 2                                       | 4.5                | 2.3     | -7.4    | 11.9           | 0.212 |
|                 |                   | 8 week    | 43                              | 3                                       | 7.0           | 44                              | 2                                       | 4.5                | 2.4     | -7.4    | 12.2           | 0.237 |
|                 |                   | 12 week   | 43                              | 1                                       | 2.3           | 44                              | 1                                       | 2.3                | 0.1     | -6.2    | 6.4            | 0.000 |
|                 | total bilirubin   | 4 week    | 44                              | 2                                       | 4.5           | 44                              | 1                                       | 2.3                | 2.3     | -5.3    | 9.9            | 0.345 |
|                 |                   | 8 week    | 43                              | 3                                       | 7.0           | 44                              | 0                                       | 0.0                | 7.0     | -0.7    | 14.6           | 3.179 |
|                 |                   | 12 week   | 43                              | 3                                       | 7.0           | 44                              | 0                                       | 0.0                | 7.0     | -0.7    | 14.6           | 3.179 |
|                 | direct bilirubin  | 4 week    | 44                              | 0                                       | 0.0           | 44                              | 0                                       | 0.0                | 0.0     | N.A.    | N.A.           | N.A.  |
|                 |                   | 8 week    | 43                              | 0                                       | 0.0           | 44                              | 0                                       | 0.0                | 0.0     | N.A.    | N.A.           | N.A.  |
|                 |                   | 12 week   | 43                              | 0                                       | 0.0           | 44                              | 0                                       | 0.0                | 0.0     | N.A.    | N.A.           | N.A.  |

n: number ;△: between-group difference (test food group - placebo group);95% CI -: 95% lower confidence interval/95% CI +: 95% upper confidence interval/chi 2: chi-square value; P: significant probability; 4 week: at test after 4 weeks of intake; 8 week: at test after 8 weeks of intake; 12 week : at test after 12 weeks of intake; N.A.: Not Available; \*: comparison between groups using chi-square test

Supplementary Table S5. Blood analysis of safety evaluation (2)

|       | Inspection item      | period  | MSM group |                                 |                                         | Placebo group |                                 |                                         | group comparison * |         |         |                |       |
|-------|----------------------|---------|-----------|---------------------------------|-----------------------------------------|---------------|---------------------------------|-----------------------------------------|--------------------|---------|---------|----------------|-------|
|       |                      |         | n         | number of eligible participants | Percentage of eligible participants (%) | n             | number of eligible participants | Percentage of eligible participants (%) | △ (%)              | 95% CI- | 95% CI+ | χ <sup>2</sup> | P     |
| blood | indirect bilirubin   | 4 week  | 44        | 2                               | 4.5                                     | 44            | 2                               | 4.5                                     | 0.0                | -8.7    | 8.7     | 0.000          | 1.000 |
|       |                      | 8 week  | 43        | 2                               | 4.7                                     | 44            | 1                               | 2.3                                     | 2.4                | -5.3    | 10.0    | 0.370          | 0.616 |
|       |                      | 12 week | 43        | 3                               | 7.0                                     | 44            | 0                               | 0.0                                     | 7.0                | -0.7    | 14.6    | 3.179          | 0.116 |
|       | cholinesterase (ChE) | 4 week  | 44        | 0                               | 0.0                                     | 44            | 1                               | 2.3                                     | -2.3               | -6.7    | 2.2     | 1.011          | 1.000 |
|       |                      | 8 week  | 43        | 0                               | 0.0                                     | 44            | 1                               | 2.3                                     | -2.3               | -6.8    | 2.2     | 0.989          | 1.000 |
|       |                      | 12 week | 43        | 1                               | 2.3                                     | 44            | 0                               | 0.0                                     | 2.3                | -2.2    | 6.8     | 1.035          | 0.494 |
|       | total protein        | 4 week  | 44        | 1                               | 2.3                                     | 44            | 0                               | 0.0                                     | 2.3                | -2.2    | 6.7     | 1.011          | 1.000 |
|       |                      | 8 week  | 43        | 2                               | 4.7                                     | 44            | 0                               | 0.0                                     | 4.7                | -1.6    | 10.9    | 2.095          | 0.241 |
|       |                      | 12 week | 43        | 1                               | 2.3                                     | 44            | 1                               | 2.3                                     | 0.1                | -6.2    | 6.4     | 0.000          | 1.000 |
|       | urea nitrogen        | 4 week  | 44        | 2                               | 4.5                                     | 44            | 4                               | 9.1                                     | -4.5               | -15.1   | 6.0     | 0.715          | 0.676 |
|       |                      | 8 week  | 43        | 1                               | 2.3                                     | 44            | 6                               | 13.6                                    | -11.3              | -22.7   | 0.1     | 3.760          | 0.110 |
|       |                      | 12 week | 43        | 1                               | 2.3                                     | 44            | 3                               | 6.8                                     | -4.5               | -13.3   | 4.3     | 1.001          | 0.616 |
|       | creatinine           | 4 week  | 44        | 0                               | 0.0                                     | 44            | 4                               | 9.1                                     | -9.1               | -17.8   | -0.4    | 4.190          | 0.116 |
|       |                      | 8 week  | 43        | 1                               | 2.3                                     | 44            | 3                               | 6.8                                     | -4.5               | -13.3   | 4.3     | 1.001          | 0.616 |
|       |                      | 12 week | 43        | 0                               | 0.0                                     | 44            | 1                               | 2.3                                     | -2.3               | -6.8    | 2.2     | 0.989          | 1.000 |
|       | uric acid            | 4 week  | 44        | 1                               | 2.3                                     | 44            | 1                               | 2.3                                     | 0.0                | -6.2    | 6.2     | 0.000          | 1.000 |
|       |                      | 8 week  | 43        | 0                               | 0.0                                     | 44            | 1                               | 2.3                                     | -2.3               | -6.8    | 2.2     | 0.989          | 1.000 |
|       |                      | 12 week | 43        | 1                               | 2.3                                     | 44            | 1                               | 2.3                                     | 0.1                | -6.2    | 6.4     | 0.000          | 1.000 |
|       | CK                   | 4 week  | 44        | 5                               | 11.4                                    | 44            | 1                               | 2.3                                     | 9.1                | -1.4    | 19.6    | 2.862          | 0.202 |
|       |                      | 8 week  | 43        | 3                               | 7.0                                     | 44            | 2                               | 4.5                                     | 2.4                | -7.4    | 12.2    | 0.237          | 0.676 |
|       |                      | 12 week | 43        | 2                               | 4.7                                     | 44            | 5                               | 11.4                                    | -6.7               | -18.1   | 4.7     | 1.324          | 0.434 |
|       | sodium               | 4 week  | 44        | 2                               | 4.5                                     | 44            | 1                               | 2.3                                     | 2.3                | -5.3    | 9.9     | 0.345          | 1.000 |
|       |                      | 8 week  | 43        | 1                               | 2.3                                     | 44            | 2                               | 4.5                                     | -2.2               | -9.9    | 5.4     | 0.322          | 1.000 |
|       |                      | 12 week | 43        | 0                               | 0.0                                     | 44            | 0                               | 0.0                                     | 0.0                | N.A.    | N.A.    | N.A.           | N.A.  |
|       | potassium            | 4 week  | 44        | 3                               | 6.8                                     | 44            | 2                               | 4.5                                     | 2.3                | -7.4    | 11.9    | 0.212          | 1.000 |
|       |                      | 8 week  | 43        | 0                               | 0.0                                     | 44            | 3                               | 6.8                                     | -6.8               | -14.5   | 0.9     | 3.037          | 0.241 |
|       |                      | 12 week | 43        | 2                               | 4.7                                     | 44            | 2                               | 4.5                                     | 0.1                | -8.7    | 8.9     | 0.001          | 1.000 |
|       | cawl                 | 4 week  | 44        | 1                               | 2.3                                     | 44            | 1                               | 2.3                                     | 0.0                | -6.2    | 6.2     | 0.000          | 1.000 |
|       |                      | 8 week  | 43        | 2                               | 4.7                                     | 44            | 1                               | 2.3                                     | 2.4                | -5.3    | 10.0    | 0.370          | 0.616 |
|       |                      | 12 week | 43        | 0                               | 0.0                                     | 44            | 1                               | 2.3                                     | -2.3               | -6.8    | 2.2     | 0.989          | 1.000 |
|       | calcium              | 4 week  | 44        | 0                               | 0.0                                     | 44            | 0                               | 0.0                                     | 0.0                | N.A.    | N.A.    | N.A.           | N.A.  |
|       |                      | 8 week  | 43        | 0                               | 0.0                                     | 44            | 0                               | 0.0                                     | 0.0                | N.A.    | N.A.    | N.A.           | N.A.  |
|       |                      | 12 week | 43        | 0                               | 0.0                                     | 44            | 0                               | 0.0                                     | 0.0                | N.A.    | N.A.    | N.A.           | N.A.  |
|       | inorganic phosphorus | 4 week  | 44        | 2                               | 4.5                                     | 44            | 3                               | 6.8                                     | -2.3               | -11.9   | 7.4     | 0.212          | 1.000 |
|       |                      | 8 week  | 43        | 2                               | 4.7                                     | 44            | 2                               | 4.5                                     | 0.1                | -8.7    | 8.9     | 0.001          | 1.000 |
|       |                      | 12 week | 43        | 2                               | 4.7                                     | 44            | 1                               | 2.3                                     | 2.4                | -5.3    | 10.0    | 0.370          | 0.616 |
|       | serum iron           | 4 week  | 44        | 2                               | 4.5                                     | 44            | 1                               | 2.3                                     | 2.3                | -5.3    | 9.9     | 0.345          | 1.000 |
|       |                      | 8 week  | 43        | 1                               | 2.3                                     | 44            | 2                               | 4.5                                     | -2.2               | -9.9    | 5.4     | 0.322          | 1.000 |
|       |                      | 12 week | 43        | 4                               | 9.3                                     | 44            | 1                               | 2.3                                     | 7.0                | -2.8    | 16.8    | 1.984          | 0.202 |
|       | serum amylase        | 4 week  | 44        | 4                               | 9.1                                     | 44            | 1                               | 2.3                                     | 6.8                | -2.9    | 16.5    | 1.908          | 0.360 |
|       |                      | 8 week  | 43        | 2                               | 4.7                                     | 44            | 0                               | 0.0                                     | 4.7                | -1.6    | 10.9    | 2.095          | 0.241 |
|       |                      | 12 week | 43        | 2                               | 4.7                                     | 44            | 1                               | 2.3                                     | 2.4                | -5.3    | 10.0    | 0.370          | 0.616 |
|       | total cholesterol    | 4 week  | 44        | 3                               | 6.8                                     | 44            | 4                               | 9.1                                     | -2.3               | -13.6   | 9.0     | 0.155          | 1.000 |
|       |                      | 8 week  | 43        | 5                               | 11.6                                    | 44            | 5                               | 11.4                                    | 0.3                | -13.1   | 13.7    | 0.001          | 1.000 |
|       |                      | 12 week | 43        | 5                               | 11.6                                    | 44            | 6                               | 13.6                                    | -2.0               | -16.0   | 12.0    | 0.079          | 1.000 |
|       | HDL-cholesterol      | 4 week  | 44        | 0                               | 0.0                                     | 44            | 1                               | 2.3                                     | -2.3               | -6.7    | 2.2     | 1.011          | 1.000 |
|       |                      | 8 week  | 43        | 0                               | 0.0                                     | 44            | 4                               | 9.1                                     | -9.1               | -17.9   | -0.3    | 4.097          | 0.116 |
|       |                      | 12 week | 43        | 4                               | 9.3                                     | 44            | 4                               | 9.1                                     | 0.2                | -11.9   | 12.4    | 0.001          | 1.000 |
|       | LDL-cholesterol      | 4 week  | 44        | 3                               | 6.8                                     | 44            | 3                               | 6.8                                     | 0.0                | -10.5   | 10.5    | 0.000          | 1.000 |
|       |                      | 8 week  | 43        | 4                               | 9.3                                     | 44            | 7                               | 15.9                                    | -6.6               | -20.6   | 7.4     | 0.859          | 0.521 |
|       |                      | 12 week | 43        | 5                               | 11.6                                    | 44            | 4                               | 9.1                                     | 2.5                | -10.3   | 15.3    | 0.151          | 0.739 |
|       | triglyceride         | 4 week  | 44        | 3                               | 6.8                                     | 44            | 4                               | 9.1                                     | -2.3               | -13.6   | 9.0     | 0.155          | 1.000 |
|       |                      | 8 week  | 43        | 3                               | 7.0                                     | 44            | 4                               | 9.1                                     | -2.1               | -13.5   | 9.3     | 0.131          | 1.000 |
|       |                      | 12 week | 43        | 2                               | 4.7                                     | 44            | 2                               | 4.5                                     | 0.1                | -8.7    | 8.9     | 0.001          | 1.000 |
|       | glucose              | 4 week  | 44        | 1                               | 2.3                                     | 44            | 1                               | 2.3                                     | 0.0                | -6.2    | 6.2     | 0.000          | 1.000 |
|       |                      | 8 week  | 43        | 1                               | 2.3                                     | 44            | 2                               | 4.5                                     | -2.2               | -9.9    | 5.4     | 0.322          | 1.000 |
|       |                      | 12 week | 43        | 1                               | 2.3                                     | 44            | 1                               | 2.3                                     | 0.1                | -6.2    | 6.4     | 0.000          | 1.000 |
|       | HbA1c (NGSP)         | 4 week  | 44        | 0                               | 0.0                                     | 44            | 0                               | 0.0                                     | 0.0                | N.A.    | N.A.    | N.A.           | N.A.  |
|       |                      | 8 week  | 43        | 0                               | 0.0                                     | 44            | 0                               | 0.0                                     | 0.0                | N.A.    | N.A.    | N.A.           | N.A.  |
|       |                      | 12 week | 43        | 0                               | 0.0                                     | 44            | 0                               | 0.0                                     | 0.0                | N.A.    | N.A.    | N.A.           | N.A.  |
|       | gycoalbumin          | 4 week  | 44        | 1                               | 2.3                                     | 44            | 3                               | 6.8                                     | -4.5               | -13.2   | 4.2     | 1.048          | 0.616 |
|       |                      | 8 week  | 43        | 1                               | 2.3                                     | 44            | 0                               | 0.0                                     | 2.3                | -2.2    | 6.8     | 1.035          | 0.494 |
|       |                      | 12 week | 43        | 1                               | 2.3                                     | 44            | 0                               | 0.0                                     | 2.3                | -2.2    | 6.8     | 1.035          | 0.494 |

n: number ;△: between-group difference (test food group - placebo group);95% CI -: 95% lower confidence interval/95% CI +: 95% upper confidence interval/chi 2: chi-square value; P: significant probability; 4 week: at test after 4 weeks of intake; 8 week: at test after 8 weeks of intake; 12 week : at test after 12 weeks of intake; N.A.: Not Available; \*: comparison between groups using chi-square test
